# Supplementary material
Source: Springer Nature journal article supplement (https://www.springermedizin.de/resource/supplementary/12895_2011_126_MOESM5_ESM.pdf/9514192)
Supplement: MOESM5 [file 9514192]

## Section

## Example information included

I. Background and HAE medical history

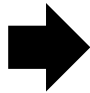

- Demographic/clinical characteristics
- HAE type and disease severity (eg frequency, location and duration of attacks, impact on ability to perform routine activities)

II. Treatment information and medical services used for HAE

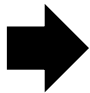

- Treatments utilized in a hospital setting for most recent attack
- Experience with preventative medications
- Reasons for discontinuing medication
- Medical resources used

III. The impact of HAE on work and school

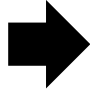

- Impact on employment prospects, absenteeism and loss of productivity, both during and between attacks
- Impact on attendance at school as well as well as reaching education potential

IV. The use of helpers due to HAE

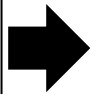

- Types of assistance required
- Impact on family members and other helpers including their loss of productivity
- Hiring home healthcare assistants

V. Satisfaction with your HAE treatment and quality of life

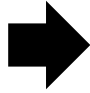

- Whether patient identifies HAE as well-controlled with current treatment
- Overall impact on HRQoL

VI. Additional questions

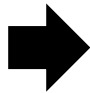

- Physical and emotional impacts associated with HAE attacks
- Current anxiety and depression as measured with the Hospital Anxiety and Depression Scale (HADS)
